# Supplementary material
Source: publisher figshare collection journal article supplement (https://geolsoc.figshare.com/ndownloader/files/26743289)
Supplement: Supplementary file 1 [file 26743289]

## Sheet: 2D surveys - recognised VZDs
Supplementary Table S1: Acquisition and processing details of 2D seismic reflection surveys
Survey name	Line	Year	Operator	Data availability	Record length	Sample interval		Streamer parameters					Source parameters
								Length	No. channels	Group interval	Tow depth		Type	Volume	Pressure	Tow depth	Shot point interval		De-multiple method	Minimum velocity analysis spacing	Migration	Polarity†
					(s)	(ms)		(km)		(m)	(m)			(in3)	(psi)	(m)	(m)			(km)
EW0113	EW0113-5	2001	Academic*	http://www-udc.ig.utexas.edu/sdc/cruise.php?cruiseIn=ew0113	16	4		6	480	12.5	6		Airgun	8445	2000	6	50		-	-	F-K migration	Reverse
	EW0113-6
Petrel Roving 1971 Marin Seismic	repro-n303	1971	Shell	https://nopims.dmp.wa.gov.au/Nopims/Search/Surveys	6	4		2.4	24	100	15		Airgun array	450	1900	10	50		-	-	-	Reverse
135	s135-s135_05	1994	AGSO	https://nopims.dmp.wa.gov.au/Nopims/Search/Surveys	16	2		4.8	192	25	10		Sleeve airgun	3000	1800	10	50		FK	2	Space-frquency time migration	Normal
	s135-s135_08
	s135-s135_11
GA310 South West Margin 2D MSS	s310-s310_59	2009	CGG Veritas	https://nopims.dmp.wa.gov.au/Nopims/Search/Surveys	12	2		8.1	648	12.5	8		Airgun	4290	2000	6	25		Radon	0.5	Pre-stack Kirchhoff time migration	Reverse
*National Science Foundation (NSF) funded academic cruise; Chief Scientist = Neal Driscoll; Collaboratin institutions = Woods Hole Oceanographic Institution, Lamont-Doherty Earth Observatory, University of Hawaii
†Where data polarity is SEG reverse, a downward increase in acoustic impedance is represented by a negative (red) reflection event and a downward decrease in acoustic impedance is a positive (black) reflection event. For normal polarity data, a red reflections is positive, and a black reflection negative
